1 ***Staphylococcus aureus* wall teichoic acid is a pathogen-associated molecular**  
2 **pattern that is recognized by langerin (CD207) on skin Langerhans cells**

3

4 Rob van Dalen<sup>1</sup>, Jacinto S. De La Cruz Diaz<sup>2</sup>, Matevž Rumpret<sup>1,#</sup>, Felix F. Fuchsberger<sup>1,3,#</sup>,  
5 Nienke H. van Teijlingen<sup>4</sup>, Jonas Hanske<sup>3</sup>, Christoph Rademacher<sup>3</sup>, Theunis B.H.  
6 Geijtenbeek<sup>4</sup>, Jos A.G. van Strijp<sup>1</sup>, Christopher Weidenmaier<sup>5,6</sup>, Andreas Peschel<sup>5,6</sup>, Daniel H.  
7 Kaplan<sup>2</sup>, and Nina M. van Sorge<sup>1,\*</sup>

8

9 <sup>1</sup> Medical Microbiology, University Medical Center Utrecht, Utrecht University; Heidelberglaan  
10 100, 3584 CX Utrecht, The Netherlands

11 <sup>2</sup> Departments of Dermatology and Immunology, University of Pittsburgh; 200 Lothrop Street,  
12 W1043 BST Pittsburgh, PA 15261, USA

13 <sup>3</sup> Department of Biomolecular Systems, Max Planck Institute of Colloids and Interfaces; Am  
14 Mühlenberg 1, 14424 Potsdam, Germany

15 <sup>4</sup> Department of Experimental Immunology, Academic Medical Center, University of  
16 Amsterdam; Meibergdreef 9, 1105 AZ Amsterdam, The Netherlands

17 <sup>5</sup> Interfaculty Institute of Microbiology and Infection Medicine, University of Tübingen; Auf der  
18 Morgenstelle 28, 72076 Tübingen, Germany

19 <sup>6</sup> German Center for Infection Research (DZIF), Partnersite Tübingen; Tübingen, Germany

20

21 # Authors contributed equally

22 \* Correspondence: nsorge3@umcutrecht.nl

## Langerin recognizes *S. aureus* wall teichoic acid

### 23 **Abstract**

24 *Staphylococcus aureus* is a major cause of skin and soft tissue infections and aggravator of  
25 the inflammatory skin disease atopic dermatitis (AD). Epicutaneous exposure to *S. aureus*  
26 induces Th17 responses through skin Langerhans cells (LCs), which paradoxically contribute  
27 to host defense but also to AD pathogenesis. The underlying molecular mechanisms of the  
28 association between *S. aureus* and skin inflammation are poorly understood. Here, we  
29 demonstrate that human LCs directly interact with *S. aureus* through the pattern-recognition  
30 receptor langerin (CD207). Human, but not mouse, langerin interacts with *S. aureus* through  
31 the conserved  $\beta$ -*N*-acetylglucosamine (GlcNAc) modifications on wall teichoic acid (WTA),  
32 thereby discriminating *S. aureus* from other staphylococcal species. Importantly, the specific  
33 *S. aureus* WTA glycoprofile strongly influences the level of Th1- and Th17-polarizing  
34 cytokines that are produced by *in vitro* generated LCs. Finally, in a murine epicutaneous  
35 infection model, *S. aureus* induced a more pronounced influx of inflammatory cells and pro-  
36 inflammatory cytokine transcripts in skin of human langerin transgenic mice compared to  
37 wild-type mice. Our findings provide molecular insight into the unique pro-inflammatory  
38 capacities of *S. aureus* in relation to inflammatory skin disease.

### 39 **Keywords**

40 Langerhans cell, langerin, *Staphylococcus aureus*, wall teichoic acid, glycosylation, atopic  
41 dermatitis

## 42 Introduction

43 The inflammatory skin disease atopic dermatitis (AD, also known as eczema) affects up to  
44 20% of children and 3% of adults worldwide (1). An important characteristic of AD is the  
45 disturbed microbiota composition with dominant presence of *Staphylococcus aureus*, but not  
46 of other staphylococcal species (2,3). In particular, the *S. aureus* CC1 lineage is  
47 overrepresented in AD isolates and was proposed to have particular yet-unidentified features  
48 that enable colonization of AD skin (4). Langerhans cells (LCs) are key sentinel cells in the  
49 skin epidermis and are implicated in *S. aureus*-induced skin inflammation. LCs are equipped  
50 with a diverse set of pattern-recognition receptors (PRRs) to sense intruders, including the  
51 LC-specific C-type lectin receptor (CLR) langerin (CD207) (5). LCs can phagocytose  
52 microbes and initiate adaptive immune responses by activating skin-resident immune  
53 memory cells or naïve immune cells in the lymph nodes (6,7). In response to *S. aureus*, LCs  
54 induce Th17 responses that help to contain *S. aureus* infection but paradoxically also  
55 aggravate AD (8,9). Despite the functional importance of LCs in *S. aureus*-mediated skin  
56 pathology, the molecular interaction between LCs and *S. aureus* and the functional response  
57 of LCs have received little attention.

58 A dominant and evolutionarily conserved component of the *S. aureus* surface is wall  
59 teichoic acid (WTA), which is important in nasal colonization, *S. aureus*-induced endocarditis,  
60 beta-lactam resistance and phage-mediated horizontal gene transfer (10-14). In the majority  
61 of *S. aureus* lineages, WTA is composed of 20-40 ribitol phosphate (RboP) repeating units  
62 modified with *D*-alanine and *N*-acetylglucosamine (GlcNAc). GlcNAc is linked to the  
63 anomeric C4 of RboP in either  $\alpha$  or  $\beta$  configuration by glycosyltransferases TarM and TarS,  
64 respectively (12,15). Several *S. aureus* WTA glycoprofiles can be discriminated: WTA  $\beta$ -  
65 GlcNAcylation is conserved in almost all *S. aureus* strains, whereas WTA  $\alpha$ -GlcNAcylation is  
66 only present in about one-third of the *S. aureus* isolates. A small selection of isolates even  
67 completely lack WTA glycosylation (10,16). Finally, WTA of *S. aureus* lineage ST395 is  
68 composed of a glycerol phosphate (GroP) backbone modified by *N*-acetylgalactosamine

## Langerin recognizes *S. aureus* wall teichoic acid

69 (GalNAc) (14). WTA glycosylation is an important determinant in host-pathogen interactions,  
70 which includes attachment to scavenger receptor SREC-1 in the nasal epithelium, and  
71 opsonization by antibodies and mannose-binding lectin (17-19).

72 We demonstrate an important role of the PRR langerin in sensing the  $\beta$ -GlcNAc  
73 epitope on *S. aureus* WTA, which explains the lack of binding to other non-AD associated  
74 staphylococcal species. Interestingly, simultaneous decoration of WTA with  $\alpha$ -GlcNAc  
75 impairs langerin interaction and dampens cytokine responses of LCs, implying that *S. aureus*  
76 can modulate immune detection and subsequent inflammation in the epidermis. Murine  
77 infection experiments confirmed that langerin contributes to enhanced skin inflammation. In  
78 conclusion, we identify WTA as a pathogen-associated molecular pattern (PAMP) of *S.*  
79 *aureus*, which is recognized by langerin on LCs.

## Langerin recognizes *S. aureus* wall teichoic acid

### 80 **Results**

#### 81 **Langerin is a receptor for *S. aureus* on human LCs**

82 The molecular interaction between LCs and *S. aureus* has received little attention. We  
83 therefore investigated whether LCs and *S. aureus* interact directly by incubating primary LCs  
84 isolated from human skin with GFP-expressing *S. aureus*. LCs from four different donors  
85 bound *S. aureus* in a dose-dependent manner (Figure 1A). The levels at which the  
86 interaction was saturated varied between the donors from approximately 40% (donor 1) to  
87 80% (donor 3) of *S. aureus*-positive LCs. To investigate the nature of interacting receptors on  
88 LCs, we pre-incubated LCs with mannan, a ligand for many PRRs of the CLR family.  
89 Depending on the bacteria-to-cell ratio, *S. aureus* binding was reduced by 35-70% compared  
90 to non-blocking conditions in all donors (Figure 1A). Similarly, the interaction was inhibited by  
91 approximately 35% by pre-incubation of the LCs with the monosaccharide GlcNAc (Figure  
92 1A). Langerin is a mannan- and GlcNAc-specific CLR that is exclusively expressed on LCs.  
93 We therefore investigated whether langerin would be involved in interaction with *S. aureus*.  
94 Indeed, pre-incubation with an anti-langerin blocking antibody reduced binding of (*spa* and  
95 *sbi*-deficient, to prevent aspecific antibody binding) *S. aureus* in donors 3 and 4 by 25-50%  
96 compared to control, depending on the infective dose (Figure 1A). To confirm involvement of  
97 langerin in the interaction between *S. aureus* and LCs, we introduced langerin in the THP1  
98 cell line, which normally does not express langerin. Transduction of langerin, but not of  
99 empty vector (EV), conferred *S. aureus* binding to THP1 cells, which could be completely  
100 inhibited by addition of mannan or anti-langerin blocking antibody (Figure 1B).

101 It was previously demonstrated that *S. aureus*-exposed LCs initiate T cell proliferation  
102 (20). However, the functional response of LCs was not assessed. Therefore, we stimulated  
103 MUTZ-3-derived LCs (muLCs), a well-established cell model for human LCs (21,22), with *S.*  
104 *aureus* and measured muLC activation through expression of co-stimulatory molecules and  
105 cytokine production after 24 hours. Indeed, muLCs upregulated expression of co-stimulatory  
106 molecules CD80 and CD86 and produced significant amounts of IL-8 and IL-12p70 in a

## Langerin recognizes *S. aureus* wall teichoic acid

107 dose-dependent response to *S. aureus* (Figure 1C). Together, these data demonstrate that  
108 LCs respond to *S. aureus* and that langerin is an important innate PRR for *S. aureus* on  
109 human LCs.

110

### 111 **Langerin recognizes *S. aureus* in a *tarS*-dependent manner through the conserved** 112 **WTA $\beta$ -GlcNAc epitope**

113 To further investigate langerin interaction with staphylococci, we tested binding of a FITC-  
114 labeled trimeric construct of the extracellular domain of human langerin (langerin-FITC) to a  
115 broader collection of 18 *S. aureus* strains from 11 different clonal complexes, as well as  
116 several coagulase-negative staphylococci (CoNS). Langerin-FITC bound to most tested *S.*  
117 *aureus* strains but to none of the CoNS species (Figure 2A), indicating that langerin interacts  
118 with a ligand that is specific for and highly conserved in *S. aureus*. The three tested *S.*  
119 *aureus* strains that showed no or low-level binding of langerin-FITC (ED133, Lowenstein and  
120 PS187; Figure 2A), differ from the other tested *S. aureus* strains in the structural composition  
121 of WTA. ED133 and Lowenstein completely lack WTA GlcNAcylation, whereas PS187  
122 belongs to the ST395 lineage that expresses GroP-GalNAc WTA (14,16,23). Given the high  
123 density of WTA on the *S. aureus* surface and apparent correlation between langerin  
124 interaction and WTA structure, we hypothesized that WTA GlcNAc modifications are likely  
125 candidates for the interaction with langerin.

126 To test this hypothesis, we assessed binding of langerin-FITC to a panel of *S. aureus*  
127 knockout strains, which lack glycosyltransferases TarM and TarS that are required to modify  
128 WTA with  $\alpha$ -GlcNAc and  $\beta$ -GlcNAc, respectively. Loss of both glycosyltransferases ( $\Delta tarMS$ )  
129 reduced langerin-FITC binding to *S. aureus* to background levels in three different *S. aureus*  
130 backgrounds (Figures 2B and S1A, B), demonstrating that WTA GlcNAc is the target for  
131 langerin. To investigate whether langerin specifically recognized either  $\alpha$ -GlcNAc or  $\beta$ -  
132 GlcNAc, we tested the individual TarM and TarS knockout strains as well as  $\Delta tarMS$   
133 complemented with either *tarM* or *tarS* on an expression plasmid ( $\Delta tarMS p tarM$  and  $\Delta tarMS$   
134 *p tarS*). Langerin-FITC only bound to *S. aureus* strains that express  $\beta$ -GlcNAc, whereas  $\alpha$ -

## Langerin recognizes *S. aureus* wall teichoic acid

135 GlcNAc was dispensable for binding (Figures 2B and S1A, B). Similarly, langerin-FITC  
136 binding to *S. aureus* strains 82086 and PS66, which are naturally deficient for WTA  $\alpha$ -  
137 GlcNAc, was completely abrogated in isogenic  $\Delta tarS$  strains (Figure 2C). These results show  
138 that langerin interacts with *S. aureus* in a *tarS*-dependent manner and provide the first  
139 demonstration of an anomeric-specific interaction of a human innate receptor with a Gram-  
140 positive surface polysaccharide.

141 Although  $\alpha$ -GlcNAc is not the target of langerin, its presence influences the level of  
142 langerin-FITC binding: mutant strains lacking *tarM* ( $\Delta tarM$  and  $\Delta tarMS$  *ptarS*) showed  
143 significantly increased binding compared to wild-type (Figures 2B and S1A, B). Possibly,  
144 enhanced binding results from loss of steric hindrance by  $\alpha$ -GlcNAc, since chemical analysis  
145 of the WTA composition by Kurokawa *et al.* suggests that WTA of strain RN4220  $\Delta tarM$  does  
146 not have increased  $\beta$ -GlcNAcylation (18).

147 As *S. aureus* expresses many human-specific adhesion or immune evasion factors  
148 (24), we investigated the interaction with murine langerin-FITC, which has 76% identity with  
149 the human langerin-FITC construct (25). Binding of murine langerin-FITC to *S. aureus* was  
150 detectable, but was 10 to 100-fold lower than human langerin (Figure S1C). The EC<sub>50</sub> of  
151 human langerin-FITC for *S. aureus* USA300 was 9.7 (8.3 – 11.3)  $\mu$ g/ml, while binding of  
152 murine langerin-FITC was not yet saturated at 50  $\mu$ g/ml. Despite low level and non-saturable  
153 binding, murine langerin interaction with *S. aureus* could be blocked by addition of mannan  
154 (data not shown), suggesting that the interaction is specific. Altogether, this indicates that the  
155 langerin-*S. aureus* interaction has a certain degree of species-specificity.

156

### 157 ***S. aureus* induces a Th1 and Th17 cytokine profile in LCs, which is affected by the** 158 **WTA glycoprofile**

159 Given the importance of langerin for interaction between *S. aureus* and LCs, we investigated  
160 whether distinct WTA GlcNAc glycoprofiles influenced the muLC response at the level of co-  
161 stimulatory molecules and cytokine expression. In line with our initial observations (Figure  
162 1D), stimulation of muLCs with wild-type *S. aureus* upregulated expression of activation

## Langerin recognizes *S. aureus* wall teichoic acid

163 markers CD80, CD83 and CD86 (Figure 3A). Stimulation with  $\beta$ -GlcNAc-deficient *S. aureus*  
164  $\Delta tarS$  reduced expression of these markers compared to wild-type, whereas stimulation with  
165  $\alpha$ -GlcNAc deficient *S. aureus*  $\Delta tarM$  enhanced expression (Figure 3A). In addition, muLCs  
166 secreted significant levels of cytokines IL-6, IL-8 IL-12p70, IL-23p19 and TNF $\alpha$  (Figure 3B),  
167 but not anti-inflammatory cytokine IL-10, in response to *S. aureus*. Cytokine levels were  
168 significantly reduced after stimulation of muLCs with *S. aureus*  $\Delta tarS$  compared to WT,  
169 whereas stimulation with *S. aureus*  $\Delta tarM$  significantly enhanced secretion of these cytokines  
170 (Figure 3B). Interestingly, the level of muLC activation correlated with the interaction levels of  
171 recombinant langerin-FITC to *S. aureus* WT,  $\Delta tarM$  and  $\Delta tarS$  strains (Figure 2B). These  
172 data suggest that the previously described Th1 and Th17-polarizing response initiated by  
173 LCs in response to *S. aureus* is strongly influenced by the specific glycoprofile of WTA.

174

### 175 **Human langerin transgenic mice show enhanced inflammation to epicutaneous *S.*** 176 ***aureus* infection**

177 Given the observed species specificity of langerin for *S. aureus* WTA  $\beta$ -GlcNAc (Figure S1A),  
178 we used human langerin - diphtheria toxin receptor (huLangerin-DTR) mice, which  
179 constitutively express human langerin on mouse LCs, as a huLangerin transgenic mouse  
180 model (26). Wild-type (WT) and huLangerin mice were epicutaneously inoculated with 1 x  
181  $10^7$  colony forming units (CFU) of *S. aureus*  $\Delta tarM$  (Figure S2A) (8,27). These genetically  
182 stable mutant bacteria are unable to modulate WTA glycosylation through regulation of *tarM*,  
183 thereby maximizing the interaction with human langerin. At the time of sacrifice and skin  
184 collection (40 hours post-infection), the lesions of the huLangerin mice were clinically  
185 different from those of WT mice (Figure S2B), although bacterial burden in the skin did not  
186 differ between the groups (Figure S2C). Histological examination of the skin revealed more  
187 extensive influx of inflammatory cells in the dermis of huLangerin mice compared to WT mice  
188 (Figure 4A). Correspondingly, we observed significantly higher expression of the mouse IL-8  
189 homolog CXCL1 (KC), but not of CXCL2 (MIP-2), in the huLangerin group as opposed to WT  
190 controls (Figures 4B and S2D). In addition, we determined the transcript levels of the Th17



## Langerin recognizes *S. aureus* wall teichoic acid

191 cytokines IL-6 and IL-17 and the anti-inflammatory cytokine IL-10. Though not significant,  
192 both IL-6 and IL-17 showed a trend towards higher production in the huLangerin group, while  
193 IL-10 was not induced in either group, corroborating the observed *in vitro* responses of  
194 muLCs to *S. aureus* stimulation (Figures 4B and S2D). These results provide a first *in vivo*  
195 demonstration of the involvement of human langerin in the skin immune response to *S.*  
196 *aureus*.

197 **Discussion**

198 Despite the emerging role of LCs in *S. aureus*-mediated skin inflammation, there is limited  
199 information on the molecular pathways and functional consequences of LC - *S. aureus*  
200 interaction. We observe that LCs respond to *S. aureus* with a Th1 and Th17-polarizing  
201 cytokine response, which corroborates findings by others, who have demonstrated that LCs  
202 internalize *S. aureus* and subsequently polarize T cells towards Th17 (8,9,20,28).  
203 Furthermore, we elucidate that detection of *S. aureus* WTA  $\beta$ -GlcNAc is of critical importance  
204 for the induced cytokine response and can also be modified by co-decoration with  $\alpha$ -GlcNAc,  
205 a characteristic of approximately one-third of *S. aureus* isolates. The ability of *S. aureus* to  
206 carefully regulate its WTA glycoprofile was also previously suggested in the context of lytic  
207 podophage infection (16). Likely, *tarM* is regulated as part of the GraRS regulon, known to  
208 control *S. aureus* susceptibility to antimicrobial defenses (29,30). However, whether and how  
209 GraRS and WTA GlcNAcylation are affected during skin colonization remains to be  
210 determined.

211 In addition to regulation of glycosylation, WTA abundance can be regulated through  
212 *tarH*, the ATPase required for WTA transport across the membrane (31). High WTA  
213 expression increases the ability to induce skin abscesses in mice (31). These results cannot  
214 be compared directly to our study, since the mice were infected subcutaneously, thereby  
215 bypassing the LCs. In addition, the species specificity of langerin should be taken into  
216 account. We demonstrate that mouse langerin shows significantly reduced binding to *S.*  
217 *aureus* compared to human langerin, underlining previous studies that reported differences in  
218 ligand specificity of these orthologs (25).

219 LCs and langerin were previously implicated in host defense against various other  
220 pathogens. LCs internalize and degrade HIV-1 viral particles in a langerin-dependent manner  
221 to prevent infection of deeper layers of the mucosa (32,33). Langerin has also been identified  
222 as a major receptor for fungal pathogens on LCs through recognition of mannose and beta-  
223 glucan structures (34). The Gram-negative bacterium *Yersinia pestis* is the only other

## Langerin recognizes *S. aureus* wall teichoic acid

224 bacterium known to interact with langerin and does so through its LPS core oligosaccharide  
225 (35). We identify *S. aureus* WTA  $\beta$ -GlcNAc as a new ligand for langerin. WTA is an abundant  
226 evolutionarily conserved feature of the surface of Gram-positive bacteria, making it  
227 advantageous for the host to recognize such structures in a timely manner. Although several  
228 receptors for *S. aureus* WTA have been described, langerin is the first human innate receptor  
229 to discriminate between the  $\alpha$ -GlcNAc and  $\beta$ -GlcNAc modifications.

230 As an opportunistic microbial resident of the skin *S. aureus* is involved in the  
231 development of skin disease. Therefore, the recognition of *S. aureus* WTA by langerin on  
232 epidermal LCs that are strategically localized at mucosal surfaces may be key to maintaining  
233 skin homeostasis and preventing the development of infection or chronic inflammation.  
234 Alternatively, it is also possible that *S. aureus* exploits langerin interaction to intentionally  
235 elicit inflammation to perturb the skin barrier and release nutrients. Our epicutaneous  
236 infection experiments in WT and huLangerin transgenic mice do not support the latter  
237 hypothesis since we did not observe differences in bacterial burden despite increased  
238 inflammation in huLangerin transgenic mice. It remains to be determined why the clearly  
239 altered skin immune response in huLangerin mice does not result in differential bacterial  
240 survival in the skin. Potentially, 40 hours post-infection is too early to observe such an effect  
241 or the expression of immune evasion molecules allows survival of *S. aureus* in this hostile  
242 environment.

243 The identification of *S. aureus* as a new langerin-interacting pathogen is especially  
244 interesting in the context of AD. First, *S. aureus* is a driver of AD disease progression, which  
245 is mediated by LCs (9). Second, genome-wide association studies (GWAS) identified *CD207*,  
246 the gene encoding for langerin, as an AD susceptibility locus (36,37). In these studies,  
247 polymorphisms in a putative enhancer region of *CD207*, which likely increase expression of  
248 langerin, were protective for AD. Our data now functionally link langerin to *S. aureus*. Since  
249 *S. aureus* is largely resistant to host defenses but most of the other commensals are not, this  
250 could explain the strong association between *S. aureus* and AD, as well as the described  
251 driver function of *S. aureus* in AD disease progression. Also our observation that WTA  $\alpha$ -

## Langerin recognizes *S. aureus* wall teichoic acid

252 GlcNAc attenuates LC activation can be important in the context of AD. The CC1 lineage is  
253 particularly overrepresented in isolates from AD skin and was suggested to have unidentified  
254 features that enable colonization by and proliferation of *S. aureus* on AD skin (4).  
255 Interestingly, all CC1 strains are *tarM*-positive (38), providing the potential to regulate WTA  
256 glycoprofile by co-decoration with  $\alpha$ -GlcNAc. This could enable the bacteria to skew the  
257 inflammatory status of the skin and gain an advantage to colonize AD skin. Our data may  
258 provide molecular insight into the association between AD and *S. aureus* from two different  
259 angles: on the immunological side we show how langerin and LCs are involved in the  
260 immune response to *S. aureus*, while on the microbiological side the involvement of langerin  
261 could explain the association of *S. aureus* but not CoNS species with AD, and possibly also  
262 the overrepresentation of *tarM*-bearing CC1 strains in AD.

263 In conclusion, we identify *S. aureus* WTA as a PAMP and pinpoint langerin as a  
264 molecular trigger for *S. aureus*-induced skin immune responses. Our findings give a deeper  
265 understanding of the specific association of *S. aureus* with skin inflammation and can help in  
266 the development of new treatment strategies for *S. aureus*-associated skin and soft tissue  
267 infections and inflammatory skin diseases.

## Langerin recognizes *S. aureus* wall teichoic acid

### 268 **Methods**

#### 269 **Bacterial strains and culture conditions**

270 *S. aureus*, *S. capitis*, *S. carnosus*, *S. epidermidis*, *S. lugdunensis*, *S. pseudintermedius*, *S.*  
271 *saprophyticus* and *S. simulans* strains (Supplementary Table S1) were grown overnight at  
272 37°C with agitation in 5 ml Todd-Hewitt broth (THB; Oxoid). For *S. aureus* strains that were  
273 plasmid complemented THB was supplemented with 10 µg/ml chloramphenicol (Sigma  
274 Aldrich). A fresh five ml THB culture was inoculated by 150 µl overnight culture and grown to  
275 an optical density at 600 nm (OD<sub>600nm</sub>) of 0.4 for *S. capitis* and to OD<sub>600nm</sub>=0.6-0.7 for all other  
276 bacteria, which corresponds to mid-exponential growth phase.

#### 277 **Cell culture and muLC differentiation**

278 MUTZ-3 cells (ACC-295, DSMZ) were cultured in a 12-well tissue culture plates (Corning) at  
279 a density of 0.5-1.0x10<sup>6</sup> cells/ml in MEM-alpha (Gibco) with 20% fetal bovine serum (FBS,  
280 Hyclone, GE Healthcare), 1% GlutaMAX (Gibco), 10% conditioned supernatant from renal  
281 carcinoma cell line 5637 (ACC-35, DSMZ), 100 U/ml penicillin and 100 µg/ml streptomycin  
282 (Gibco) at 37°C with 5% CO<sub>2</sub>. We obtained MUTZ-3 derived Langerhans cells (muLCs) by  
283 differentiation of MUTZ-3 cells for 10 days in 100 ng/ml Granulocyte-Macrophage Colony  
284 Stimulating Factor (GM-CSF, GenWay Biotech), 10 ng/ml Transforming Growth Factor-beta  
285 (TGFβ; R&D Systems) and 2.5 ng/ml Tumor Necrosis Factor-alpha (TNFα; R&D Systems) as  
286 described previously (21,22). The phenotype of differentiated muLCs was verified by surface  
287 staining of CD34 (clone 581, BD Biosciences), CD1a (clone HI149, BD Biosciences) and  
288 CD207 (clone DCGM4, Beckman Coulter) using the respective antibodies and analysis by  
289 flow cytometry.

290 THP1 cells (TIB-202, ATCC) transduced with a lentiviral langerin construct or empty vector  
291 (EV) were cultured in RPMI (Lonza) supplemented with 5% FBS (Biowest), 1% GlutaMAX  
292 100 U/ml penicillin and 100 µg/ml streptomycin (Gibco) at 37°C with 5% CO<sub>2</sub>.

#### 293 **Isolation of primary human Langerhans cells**

## Langerin recognizes *S. aureus* wall teichoic acid

294 Human skin tissue was collected from otherwise healthy anonymous donors undergoing  
295 corrective breast or abdominal surgery. This study, including the tissue harvesting  
296 procedures, were approved by the Medical Ethics Review Committee of the Academic  
297 Medical Center Amsterdam, The Netherlands. Human Langerhans cells were isolated as  
298 described previously (33). In short, skin grafts were obtained using a dermatome (Zimmer)  
299 and incubated in medium supplemented with Dispase II (1 U/ml, Roche Diagnostics) after  
300 which epidermal sheets were separated from the dermis and cultured for three days. After  
301 incubation, migrated LCs were harvested and further purified using a Ficoll gradient (Axis-  
302 shield). Isolated LCs were routinely 90% pure (CD1a+ Langerin+) and were frozen in Iscoves  
303 Modified Dulbeccos's Medium (IMDM, Thermo Fisher) supplemented with 20% FBS and  
304 10% DMSO. Before use, LCs were thawed by drop-wise addition of cold IMDM with 10%  
305 FBS, washed twice and incubated in IMDM with FBS for 2 hours at 37°C with 5% CO<sub>2</sub> to  
306 recover.

### 307 **Creation of GFP-expression *S. aureus***

308 To create GFP-expressing bacteria, *S. aureus* Newman wild-type and *S. aureus* Newman  
309  $\Delta spa\Delta sbi$  were transformed as described previously with pCM29, which encodes  
310 superfolded green fluorescent protein (sGFP) driven by the *sarAP1* promoter (39,40). In  
311 short, competent *S. aureus* were electroporated with pCM29 isolated from *E. coli* DC10B  
312 with a Gene Pulser II (BioRad; 100 Ohm, 25uF, 2.5kV). After recovery, bacteria were  
313 selected on TH agar supplemented with 10 µg/ml chloramphenicol. A single colony was  
314 grown in THB with 10 µg/ml chloramphenicol under the usual growth conditions. Bacterial  
315 expression of GFP was verified by confocal laser scanning microscopy (SP5, Leica).

### 316 **Gamma-irradiation of *S. aureus***

317 Gamma-irradiated stocks of *S. aureus* strains were made by harvesting cultures in mid-  
318 exponential growth phase by centrifugation (4,000 rpm, 8 min), which were concentrated 10x  
319 in phosphate-buffered saline (PBS; Lonza) with 17% glycerol (VWR), frozen at -70°C and  
320 exposed to 10 kGy of  $\gamma$ -radiation (Synergy Health, Ede, The Netherlands). Loss of viability of

## Langerin recognizes *S. aureus* wall teichoic acid

321 *S. aureus* was verified by plating of the irradiated bacteria. A non-irradiated aliquot that  
322 underwent the same freezing procedure was used to determine the concentration of colony  
323 forming units (CFU) of the irradiated stocks.

### 324 **Lentiviral transduction**

325 A TrueORF sequence-validated cDNA clone of human CD207 (OriGene Technologies) was  
326 amplified by PCR using Phusion polymerase (Thermo Fisher) and primers hLangerin-Fw and  
327 hLangerin-FLAG-Rv (IDT, Supplementary Table S2). The PCR amplicon was cloned in a  
328 BIC-PGK-Zeo-T2a-mAmetrine;EF1A construct by Gibson assembly (NEB) according to the  
329 manufacturer's instructions. The langerin-encoding vector and an empty vector (EV) control  
330 were introduced into THP1 cells by lentiviral transduction, as described by Van de Weijer *et*  
331 *al.* (41). In short, lentivirus was produced by HEK293T cells (CRL-3216, ATCC) in 24-well  
332 plates using standard lentiviral production protocols and third-generation packaging vectors.  
333 After 3-4 days the supernatant containing the viral particles was harvested and stored at -  
334 70°C to kill any remaining cells. Approximately 50,000 THP1 cells were transduced by spin  
335 infection (1000xg, 2 h, 33°C) using 100 µl supernatant supplemented with 8 µg/ml polybrene  
336 (Santa Cruz Biotechnology). Complete medium was added after centrifugation and cells  
337 were selected three days post-infection by 100 µg/ml zeocin (Gibco). Cellular expression of  
338 langerin was verified by antibody staining of langerin (clone DCGM4, Beckman Coulter) and  
339 measured using flow cytometry.

### 340 **Bacterial binding assays**

341 To test binding of bacteria to cells, 10<sup>5</sup> LCs, THP1-EV or THP1-langerin were incubated with  
342 GFP-expressing *S. aureus* Newman or GFP-expressing *S. aureus* Newman  $\Delta spa \Delta sbi$  at  
343 bacteria-to-cell ratios from 1 to 8 in TSM buffer (2.4 g/L Tris (Roche), 8.77 g/L NaCl (Sigma  
344 Aldrich), 294 mg/L CaCl<sub>2</sub>·2H<sub>2</sub>O (Merck), 294 mg/L MgCl<sub>2</sub>·6H<sub>2</sub>O (Merck), pH=7.4) with 0.1%  
345 bovine serum albumin (BSA; Merck) for 30 minutes at 4°C. Binding was blocked by 15  
346 minutes pre-incubation with 10 µg/ml mannan (Sigma Aldrich), 50 mM GlcNAc (Serva) or 20  
347 µg/ml anti-langerin blocking antibody (clone 10E2, Sony Biotechnology). Cells were washed

## Langerin recognizes *S. aureus* wall teichoic acid

348 once with TSM 1% BSA, fixed in 1% formaldehyde (Brunschwig Chemie) in PBS and  
349 measured by flow cytometry.

### 350 **Production of recombinant langerin extracellular domains**

351 The extracellular domains of truncated human langerin (residues 148–328) and mouse  
352 langerin (residues 150–331) were recombinantly expressed from codon-optimized constructs  
353 containing a C-terminal TEV cleavage site followed by a Strep-tag II cloned into pUC19 and  
354 pET30a (EMD Millipore) expression vectors as described previously (25). Recombinant  
355 human and murine ECDs were insolubly expressed in *E. coli* BL21(DE3), solubilized in 6 M  
356 guanidinium hydrochloride in 100 mM Tris (pH 8) with 1 mM DTT, refolded by dialysis  
357 against Tris-buffered saline (pH 7.5) containing 10 mM CaCl<sub>2</sub> and purified via mannan-  
358 coupled sepharose beads (Sigma Aldrich). Bound protein was eluted with Tris-buffered  
359 saline (pH 7.5) containing 5 mM EDTA. Protein concentrations were determined by A280 nm  
360 using the calculated molar extinction coefficients of 56,170 M<sup>-1</sup> cm<sup>-1</sup> for the human langerin  
361 ECD and 56,170 M<sup>-1</sup> cm<sup>-1</sup> for the murine ECD. The proteins were fluorescently labeled with  
362 fluorescein isothiocyanate (FITC, Thermo Fisher) by adding slowly 100 μL of the dye solution  
363 (1 mg/ml in DMSO) to 2 ml of a 2 mg/ml protein solution in HEPES-buffered saline (pH 7.2)  
364 containing 20 mM D-mannose (Sigma Aldrich) and 5 mM CaCl<sub>2</sub>. After stirring for 90 min at  
365 room temperature, the reaction was quenched by addition of 50 mM ethanolamine (pH 8.5,  
366 Sigma Aldrich). Unreacted dye molecules were removed by buffer exchange using a Zeba  
367 spin column (Thermo Fisher) and active protein was purified over mannan affinity column as  
368 described above. All chemicals used for the production of recombinant langerin extracellular  
369 domains were obtained from Carl Roth if not indicated otherwise.

### 370 **Langerin binding assay**

371 Bacteria in mid-exponential growth phase were harvested by centrifugation (4,000 rpm, 8  
372 minutes) and resuspended at OD<sub>600nm</sub>=0.4 in TSM buffer with 0.1% BSA. Bacteria were  
373 incubated with 1-50 μg/ml recombinant langerin-FITC (human or mouse) for 30 minutes at



## Langerin recognizes *S. aureus* wall teichoic acid

374 37°C with agitation, washed once with TSM 1% BSA, fixed in 1% formaldehyde and  
375 analyzed by flow cytometry.

### 376 **muLC stimulation**

377 We stimulated  $5 \times 10^4$  muLCs with *S. aureus* USA300 WT, USA300  $\Delta tarM$  or USA300  $\Delta tarS$   
378 at bacteria-to-cell ratios of 0, 1, 10 and 50 in IMDM with 10% FBS. After 24 hours,  
379 supernatants were collected by centrifugation (300xg, 10 min, 4°C) and stored at -150°C until  
380 further analysis, and cells were washed once in PBS 0.1% BSA. Expression levels of the  
381 activation and maturation markers were determined by flow cytometry using the following  
382 antibodies: CD80 (clone 2D10), CD83 (clone HB15e) and CD86 (clone IT2.2, all from Sony  
383 Biotechnology) and their corresponding isotype controls (BD Biosciences).

### 384 **Cytokine assays**

385 The IL-8 and IL12p70 concentrations were initially determined by ELISA (Sanquin and  
386 Thermo Fisher, respectively) according to the manufacturer's instructions. Concentrations of  
387 IL-6, IL-8, IL-10, IL-12p70, IL-23p19 and TNF $\alpha$  cytokines were determined by Luminex xMAP  
388 assay (Luminex Corporation), performed by the Multiplex Core Facility UMC Utrecht, The  
389 Netherlands.

### 390 **Flow cytometry**

391 Flow cytometry was performed on FACSVerse (BD Biosciences), per sample 10.000 events  
392 within the set gate were collected. Data were analyzed using FlowJo 10 (FlowJo, LLC).

### 393 **Epicutaneous murine infection model**

394 We used 6- to 10 week-old sex-matched wild type C57BL/6 mice (obtained from Jackson  
395 laboratories) and huLangerin-DTR mice (26), provided by D. H. Kaplan (University of  
396 Pittsburgh, Pennsylvania USA). All mice were housed in a specific pathogen-free facility  
397 under standard conditions at the University of Pittsburgh. The mouse infection protocols were  
398 approved beforehand by the Institutional Animal Care and Use of Committee of the  
399 University of Pittsburgh. As described previously, mice were first anesthetized with a mixture

## Langerin recognizes *S. aureus* wall teichoic acid

400 of ketamine and xylazine (100/10 mg/kg body weight), shaved on the back with electric  
401 clippers, chemically depilated with Nair hair removal cream (Church & Dwight) according to  
402 the manufacturer's instructions, and the stratum corneum was removed by 15 strokes of 220  
403 grit sandpaper (3M) (8,27). After 24 hours, the mice were epicutaneously inoculated with  
404 PBS or *S. aureus* USA300  $\Delta tarM$ , which was grown overnight at 37°C in THB, in 50  $\mu$ l of  
405 sterile PBS. Forty hours post-infection the mice were sacrificed and skin sections of 1 cm<sup>2</sup>  
406 were collected. The sections were either 1) homogenized, serially diluted in sterile PBS,  
407 grown overnight on THB-agar plates at 37°C and colony forming units were counted, 2)  
408 homogenized and processed for RNA extraction or 3) fixed in 1% formalin in PBS. The fixed  
409 tissue sections were embedded in paraffin, cut, stained with hematoxylin and eosin, and  
410 digitalized (Hamamatsu NanoZoomer) by the Department of Pathology, UMC Utrecht, The  
411 Netherlands, and subsequently analyzed using NDP.view2.6.13 (Hamamatsu).

### 412 **Gene expression analysis**

413 Whole skin was homogenized and processed for extraction and isolation of RNA, using  
414 TRIzol reagents (Thermo Fisher), following manufacturer's instructions. RNA was quantified  
415 using a standard Nanodrop and cDNA was obtained using High-Capacity cDNA Reverse  
416 Transcriptase (Thermo Fisher). Quantitative PCR on cDNA was accomplished by using  
417 Taqman Gene Expression Master Mix and Taqman Gene Expression Assays for *IL-17*, *IL-6*,  
418 *CXCL1*, *CXCL2*, *IL-10* and *GAPDH* (Thermo Fisher) on a StepOnePlus Real Time PCR  
419 System (Applied Biosystems). Fold upregulation of transcripts was calculated from  $\Delta\Delta C_t$   
420 values relative to *GAPDH* expression and normalized for PBS mock infection.

### 421 **Statistical analysis**

422 Statistical analyses were performed using Graphpad Prism 7.02 (GraphPad Software). We  
423 used unpaired two-tailed *t*-tests for comparisons between two groups and one-way ANOVAs  
424 with a common control group followed by Dunnett's multiple comparisons test. The THP1-  
425 langerin dose-response curves were tested using a two-way ANOVA followed by Dunnett's  
426 multiple comparison test and the langerin-FITC concentration curves were tested against

## Langerin recognizes *S. aureus* wall teichoic acid

427 wild-type langerin-FITC using a two-way ANOVA followed by Tukey's multiple comparison  
428 test. Data are presented as the geometric mean or percentage positive cells (flow cytometry),  
429 mean concentration (cytokine arrays) or fold upregulation (real-time PCR) + standard error of  
430 the mean (SEM).

### 431 **Data availability**

432 The data that support these findings are available from the corresponding author upon  
433 request.

### 434 **Acknowledgements**

435 The authors would like to thank: the Multiplex Core Facility (UMC Utrecht, The Netherlands)  
436 for performing the Luminex assay; David Gerlach, Guoqing Xia and Volker Winstel (currently  
437 or previously at University of Tübingen, Germany) for advice and communication regarding  
438 the shipment of strains; Samantha van der Beek, Eline van Yperen and Małgorzata Mnich  
439 (UMC Utrecht, The Netherlands) for technical assistance; Tanja de Gruijl (VU University  
440 Medical Center, Amsterdam, The Netherlands) for the protocol detailing MUTZ-3 culture and  
441 differentiation. This work was supported by a VIDI grant (91713303) from the Dutch Scientific  
442 Organization (NWO) to N.M.v.S and R.v.D. A.P. is supported by German Research Council  
443 (DFG) grants TRR34, TRR156 and the German Center for Infection Research (DZIF). J.H.  
444 thanks the DFG Collaborative Research Centre 765 "Multivalency" for a fellowship. C.R.  
445 thanks the DFG for funding (RA1944/2-1).

### 446 **Author Contributions**

447 R.v.D., M.R. and N.M.v.S. planned the experiments. R.v.D., J.S.D.L.C.D. and M.R.  
448 performed the experiments and prepared the figures. F.F.F., J.H. and C.R. supplied the  
449 langerin-FITC constructs, N.H.v.T. and T.B.H.G. provided the primary LCs, C.W. and A.P.  
450 provided the bacterial strains, D.H.K. provided the mice. R.v.D. and N.M.v.S. wrote the  
451 manuscript, N.H.v.T., J.A.G.v.S., C.W. and A.P provided critical feedback.

## Langerin recognizes *S. aureus* wall teichoic acid

### 452 **Competing interests**

453 The authors declare no competing financial interests.

454 **References**

- 455 1. Nutten S (2015) Atopic dermatitis: global epidemiology and risk factors. *Ann Nutr Metab*  
456 66 Suppl 1:8-16. Doi:10.1159/000370220
- 457 2. Totte JE, van der Feltz WT, Hennekam M, van Belkum A, van Zuuren EJ, et al. (2016)  
458 Prevalence and odds of *Staphylococcus aureus* carriage in atopic dermatitis: a systematic  
459 review and meta-analysis. *Br J Dermatol*. Doi:10.1111/bjd.14566
- 460 3. Nakatsuji T, Chen TH, Narala S, Chun KA, Two AM, et al. (2017) Antimicrobials from  
461 human skin commensal bacteria protect against *Staphylococcus aureus* and are deficient in  
462 atopic dermatitis. *Sci Transl Med* 9(378). Doi:10.1126/scitranslmed.aah4680
- 463 4. Geoghegan JA, Irvine AD, Foster TJ (2017) *Staphylococcus aureus* and Atopic Dermatitis:  
464 A Complex and Evolving Relationship. *Trends Microbiol*. Doi:10.1016/j.tim.2017.11.008
- 465 5. Valladeau J, Ravel O, Dezutter-Dambuyant C, Moore K, Kleijmeer M, et al. (2000)  
466 Langerin, a novel C-type lectin specific to Langerhans cells, is an endocytic receptor that  
467 induces the formation of Birbeck granules. *Immunity* 12(1):71-81.
- 468 6. Kissenpfennig A, Henri S, Dubois B, Laplace-Builhe C, Perrin P, et al. (2005) Dynamics  
469 and function of Langerhans cells in vivo: dermal dendritic cells colonize lymph node areas  
470 distinct from slower migrating Langerhans cells. *Immunity* 22(5):643-54.  
471 Doi:10.1016/j.immuni.2005.04.004
- 472 7. Seneschal J, Clark RA, Gehad A, Baecher-Allan CM, Kupper TS (2012) Human epidermal  
473 Langerhans cells maintain immune homeostasis in skin by activating skin resident regulatory  
474 T cells. *Immunity* 36(5):873-84. Doi:10.1016/j.immuni.2012.03.018
- 475 8. Igyártó BZ, Haley K, Ortner D, Bobr A, Gerami-Nejad M, et al. (2011) Skin-resident murine  
476 dendritic cell subsets promote distinct and opposing antigen-specific T helper cell responses.  
477 *Immunity* 35(2):260-72. Doi:10.1016/j.immuni.2011.06.005
- 478 9. Kobayashi T, Glatz M, Horiuchi K, Kawasaki H, Akiyama H, et al. (2015) Dysbiosis and  
479 *Staphylococcus aureus* Colonization Drives Inflammation in Atopic Dermatitis. *Immunity*  
480 42(4):756-66. Doi:10.1016/j.immuni.2015.03.014
- 481 10. Winstel V, Kuhner P, Salomon F, Larsen J, Skov R, et al. (2015) Wall Teichoic Acid  
482 Glycosylation Governs *Staphylococcus aureus* Nasal Colonization. *mBio* 6(4):e00632.  
483 Doi:10.1128/mBio.00632-15
- 484 11. Weidenmaier C, Peschel A, Xiong YQ, Kristian SA, Dietz K, et al. (2005) Lack of wall  
485 teichoic acids in *Staphylococcus aureus* leads to reduced interactions with endothelial cells  
486 and to attenuated virulence in a rabbit model of endocarditis. *The Journal of infectious*  
487 *diseases* 191(10):1771-7. Doi:10.1086/429692
- 488 12. Brown S, Xia G, Luhachack LG, Campbell J, Meredith TC, et al. (2012) Methicillin  
489 resistance in *Staphylococcus aureus* requires glycosylated wall teichoic acids. *Proceedings*  
490 *of the National Academy of Sciences of the United States of America* 109(46):18909-14.  
491 Doi:10.1073/pnas.1209126109

Langerin recognizes *S. aureus* wall teichoic acid

- 492 13. Xia G, Corrigan RM, Winstel V, Goerke C, Grundling A, et al. (2011) Wall teichoic Acid-  
493 dependent adsorption of staphylococcal siphovirus and myovirus. *Journal of bacteriology*  
494 193(15):4006-9. Doi:10.1128/JB.01412-10
- 495 14. Winstel V, Liang C, Sanchez-Carballo P, Steglich M, Munar M, et al. (2013) Wall teichoic  
496 acid structure governs horizontal gene transfer between major bacterial pathogens. *Nature*  
497 *communications* 4:2345. Doi:10.1038/ncomms3345
- 498 15. Xia G, Maier L, Sanchez-Carballo P, Li M, Otto M, et al. (2010) Glycosylation of wall  
499 teichoic acid in *Staphylococcus aureus* by TarM. *The Journal of biological chemistry*  
500 285(18):13405-15. Doi:10.1074/jbc.M109.096172
- 501 16. Li X, Gerlach D, Du X, Larsen J, Stegger M, et al. (2015) An accessory wall teichoic acid  
502 glycosyltransferase protects *Staphylococcus aureus* from the lytic activity of Podoviridae. *Sci*  
503 *Rep* 5:17219. Doi:10.1038/srep17219
- 504 17. Baur S, Rautenberg M, Faulstich M, Grau T, Severin Y, et al. (2014) A nasal epithelial  
505 receptor for *Staphylococcus aureus* WTA governs adhesion to epithelial cells and modulates  
506 nasal colonization. *PLoS pathogens* 10(5):e1004089. Doi:10.1371/journal.ppat.1004089
- 507 18. Kurokawa K, Jung DJ, An JH, Fuchs K, Jeon YJ, et al. (2013) Glycoepitopes of  
508 staphylococcal wall teichoic acid govern complement-mediated opsonophagocytosis via  
509 human serum antibody and mannose-binding lectin. *The Journal of biological chemistry*  
510 288(43):30956-68. Doi:10.1074/jbc.M113.509893
- 511 19. Park KH, Kurokawa K, Zheng L, Jung DJ, Tateishi K, et al. (2010) Human serum  
512 mannose-binding lectin senses wall teichoic acid Glycopolymer of *Staphylococcus aureus*,  
513 which is restricted in infancy. *The Journal of biological chemistry* 285(35):27167-75.  
514 Doi:10.1074/jbc.M110.141309
- 515 20. van der Aar AM, Picavet DI, Muller FJ, de Boer L, van Capel TM, et al. (2013)  
516 Langerhans cells favor skin flora tolerance through limited presentation of bacterial antigens  
517 and induction of regulatory T cells. *The Journal of investigative dermatology* 133(5):1240-9.  
518 Doi:10.1038/jid.2012.500
- 519 21. Masterson AJ, Sombroek CC, De Gruijl TD, Graus YM, van der Vliet HJ, et al. (2002)  
520 MUTZ-3, a human cell line model for the cytokine-induced differentiation of dendritic cells  
521 from CD34+ precursors. *Blood* 100(2):701-3.
- 522 22. Santegoets SJ, Masterson AJ, van der Sluis PC, Lougheed SM, Fluitsma DM, et al.  
523 (2006) A CD34(+) human cell line model of myeloid dendritic cell differentiation: evidence for  
524 a CD14(+)CD11b(+) Langerhans cell precursor. *Journal of leukocyte biology* 80(6):1337-44.  
525 Doi:10.1189/jlb.0206111
- 526 23. Lee JH, Kim NH, Winstel V, Kurokawa K, Larsen J, et al. (2015) Surface Glycopolymers  
527 Are Crucial for In Vitro Anti-Wall Teichoic Acid IgG-Mediated Complement Activation and  
528 Opsonophagocytosis of *Staphylococcus aureus*. *Infect Immun* 83(11):4247-55.  
529 Doi:10.1128/IAI.00767-15

Langerin recognizes *S. aureus* wall teichoic acid

- 530 24. Koymans KJ, Vrieling M, Gorham RD, Jr., van Strijp JA (2016) Staphylococcal Immune  
531 Evasion Proteins: Structure, Function, and Host Adaptation. *Curr Top Microbiol Immunol.*  
532 Doi:10.1007/82\_2015\_5017
- 533 25. Hanske J, Schulze J, Aretz J, McBride R, Loll B, et al. (2017) Bacterial Polysaccharide  
534 Specificity of the Pattern Recognition Receptor Langerin Is Highly Species-dependent. *The*  
535 *Journal of biological chemistry* 292(3):862-71. Doi:10.1074/jbc.M116.751750
- 536 26. Bobr A, Olvera-Gomez I, Igyarto BZ, Haley KM, Hogquist KA, et al. (2010) Acute ablation  
537 of Langerhans cells enhances skin immune responses. *J Immunol* 185(8):4724-8.  
538 Doi:10.4049/jimmunol.1001802
- 539 27. Kashem SW, Igyarto BZ, Gerami-Nejad M, Kumamoto Y, Mohammed J, et al. (2015)  
540 *Candida albicans* morphology and dendritic cell subsets determine T helper cell  
541 differentiation. *Immunity* 42(2):356-66. Doi:10.1016/j.immuni.2015.01.008
- 542 28. Iwamoto K, Moriwaki M, Niitsu Y, Saino M, Takahagi S, et al. (2017) *Staphylococcus*  
543 *aureus* from atopic dermatitis skin alters cytokine production triggered by monocyte-derived  
544 Langerhans cell. *J Dermatol Sci.* Doi:10.1016/j.jdermsci.2017.08.001
- 545 29. Kraus D, Herbert S, Kristian SA, Khosravi A, Nizet V, et al. (2008) The GraRS regulatory  
546 system controls *Staphylococcus aureus* susceptibility to antimicrobial host defenses. *BMC*  
547 *Microbiol* 8:85. Doi:10.1186/1471-2180-8-85
- 548 30. Falord M, Mader U, Hiron A, Debarbouille M, Msadek T (2011) Investigation of the  
549 *Staphylococcus aureus* GraSR regulon reveals novel links to virulence, stress response and  
550 cell wall signal transduction pathways. *PLoS One* 6(7):e21323.  
551 Doi:10.1371/journal.pone.0021323
- 552 31. Wanner S, Schade J, Keinhorster D, Weller N, George SE, et al. (2017) Wall teichoic  
553 acids mediate increased virulence in *Staphylococcus aureus*. *Nat Microbiol* 2:16257.  
554 Doi:10.1038/nmicrobiol.2016.257
- 555 32. de Witte L, Nabatov A, Pion M, Fluittsma D, de Jong MA, et al. (2007) Langerin is a  
556 natural barrier to HIV-1 transmission by Langerhans cells. *Nature medicine* 13(3):367-71.  
557 Doi:10.1038/nm1541
- 558 33. Ribeiro CM, Sarrami-Forooshani R, Setiawan LC, Zijlstra-Willems EM, van Hamme JL, et  
559 al. (2016) Receptor usage dictates HIV-1 restriction by human TRIM5alpha in dendritic cell  
560 subsets. *Nature* 540(7633):448-52. Doi:10.1038/nature20567
- 561 34. de Jong MA, Vriend LE, Theelen B, Taylor ME, Fluittsma D, et al. (2010) C-type lectin  
562 Langerin is a beta-glucan receptor on human Langerhans cells that recognizes opportunistic  
563 and pathogenic fungi. *Mol Immunol* 47(6):1216-25. Doi:10.1016/j.molimm.2009.12.016
- 564 35. Yang K, Park CG, Cheong C, Bulgheresi S, Zhang S, et al. (2015) Host Langerin  
565 (CD207) is a receptor for *Yersinia pestis* phagocytosis and promotes dissemination.  
566 *Immunology and cell biology* 93(9):815-24. Doi:10.1038/icb.2015.46



Langerin recognizes *S. aureus* wall teichoic acid

- 567 36. Paternoster L, Standl M, Waage J, Baurecht H, Hotze M, et al. (2015) Multi-ancestry  
568 genome-wide association study of 21,000 cases and 95,000 controls identifies new risk loci  
569 for atopic dermatitis. *Nat Genet* 47(12):1449-56. Doi:10.1038/ng.3424
- 570 37. Cai XY, Zheng XD, Fang L, Zhou FS, Sheng YJ, et al. (2017) A variant on chromosome  
571 2p13.3 is associated with atopic dermatitis in Chinese Han population. *Gene* 628:281-5.  
572 Doi:10.1016/j.gene.2017.07.059
- 573 38. Winstel V, Xia G, Peschel A (2014) Pathways and roles of wall teichoic acid glycosylation  
574 in *Staphylococcus aureus*. *International journal of medical microbiology : IJMM* 304(3-4):215-  
575 21. Doi:10.1016/j.ijmm.2013.10.009
- 576 39. Pang YY, Schwartz J, Thoendel M, Ackermann LW, Horswill AR, et al. (2010) agr-  
577 Dependent interactions of *Staphylococcus aureus* USA300 with human polymorphonuclear  
578 neutrophils. *J Innate Immun* 2(6):546-59. Doi:10.1159/000319855
- 579 40. Schenk S, Laddaga RA (1992) Improved method for electroporation of *Staphylococcus*  
580 *aureus*. *FEMS Microbiol Lett* 73(1-2):133-8.
- 581 41. van de Weijer ML, van Muijlwijk GH, Visser LJ, Costa AI, Wiertz EJ, et al. (2016) The E3  
582 Ubiquitin Ligase TMEM129 Is a Tri-Spanning Transmembrane Protein. *Viruses* 8(11).  
583 Doi:10.3390/v8110309
- 584 42. Sibbald MJ, Winter T, van der Kooi-Pol MM, Buist G, Tsompanidou E, et al. (2010)  
585 Synthetic effects of secG and secY2 mutations on exoproteome biogenesis in  
586 *Staphylococcus aureus*. *Journal of bacteriology* 192(14):3788-800. Doi:10.1128/JB.01452-09
- 587 43. Kreiswirth BN, Lofdahl S, Betley MJ, O'Reilly M, Schlievert PM, et al. (1983) The toxic  
588 shock syndrome exotoxin structural gene is not detectably transmitted by a prophage. *Nature*  
589 305(5936):709-12.
- 590 44. CDC (1999) From the Centers for Disease Control and Prevention. Four pediatric deaths  
591 from community-acquired methicillin-resistant *Staphylococcus aureus*--Minnesota and North  
592 Dakota, 1997-1999. *JAMA* 282(12):1123-5.
- 593 45. Mwangi MM, Wu SW, Zhou Y, Sieradzki K, de Lencastre H, et al. (2007) Tracking the in  
594 vivo evolution of multidrug resistance in *Staphylococcus aureus* by whole-genome  
595 sequencing. *Proceedings of the National Academy of Sciences of the United States of*  
596 *America* 104(22):9451-6. Doi:10.1073/pnas.0609839104
- 597 46. Guinane CM, Ben Zakour NL, Tormo-Mas MA, Weinert LA, Lowder BV, et al. (2010)  
598 Evolutionary genomics of *Staphylococcus aureus* reveals insights into the origin and  
599 molecular basis of ruminant host adaptation. *Genome Biol Evol* 2:454-66.  
600 Doi:10.1093/gbe/evq031
- 601 47. Rosenstein R, Nerz C, Biswas L, Resch A, Raddatz G, et al. (2009) Genome analysis of  
602 the meat starter culture bacterium *Staphylococcus carnosus* TM300. *Appl Environ Microbiol*  
603 75(3):811-22. Doi:10.1128/AEM.01982-08



Langerin recognizes *S. aureus* wall teichoic acid

- 604 48. Mack D, Siemssen N, Laufs R (1992) Parallel induction by glucose of adherence and a  
605 polysaccharide antigen specific for plastic-adherent *Staphylococcus epidermidis*: evidence  
606 for functional relation to intercellular adhesion. *Infection and immunity* 60(5):2048-57.
- 607 49. Chassain B, Lemee L, Didi J, Thiberge JM, Brisse S, et al. (2012) Multilocus sequence  
608 typing analysis of *Staphylococcus lugdunensis* implies a clonal population structure. *J Clin*  
609 *Microbiol* 50(9):3003-9. Doi:10.1128/JCM.00988-12
- 610 50. Ben Zakour NL, Bannoehr J, van den Broek AH, Thoday KL, Fitzgerald JR (2011)  
611 Complete genome sequence of the canine pathogen *Staphylococcus pseudintermedius*.  
612 *Journal of bacteriology* 193(9):2363-4. Doi:10.1128/JB.00137-11
- 613 51. Monk IR, Shah IM, Xu M, Tan MW, Foster TJ (2012) Transforming the untransformable:  
614 application of direct transformation to manipulate genetically *Staphylococcus aureus* and  
615 *Staphylococcus epidermidis*. *mBio* 3(2). Doi:10.1128/mBio.00277-11
- 616

## Langerin recognizes *S. aureus* wall teichoic acid

### 617 Figures

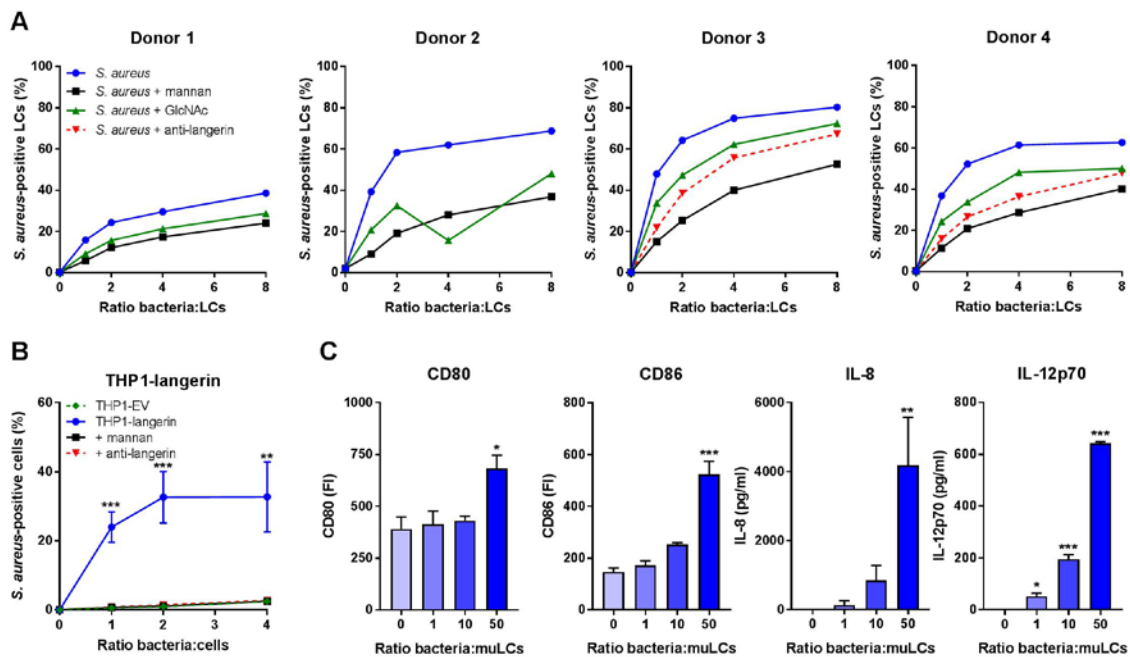

618

### 619 **Figure 1. Langerin is a receptor for *S. aureus* on human LCs**

620 (A) Binding of *S. aureus* to isolated primary human LCs. LCs from donors 1 and 2 were  
 621 incubated with GFP-expressing *S. aureus* Newman and LCs from donors 3 and 4 with GFP-  
 622 expressing *S. aureus* Newman  $\Delta spa\Delta sbi$  and binding was assessed by flow cytometry. The  
 623 interaction was blocked by addition of mannan, GlcNAc or anti-langerin blocking antibody  
 624 (donors 3 and 4 only).

625 (B) Binding of *S. aureus* to THP1-langerin cells. Human langerin-transduced or empty vector  
 626 (EV)-transduced THP1 cells were incubated with different amounts of GFP-expressing *S.*  
 627 *aureus* Newman  $\Delta spa\Delta sbi$ . The interaction was blocked by addition of mannan or anti-  
 628 langerin blocking antibody. Within each ratio, THP1-langerin was compared to the other  
 629 conditions by two-way ANOVA followed by Dunnett's multiple comparison test.

630 (C) Expression of co-stimulatory molecules CD80 and CD86 and production of cytokines IL-8  
 631 and IL12p70 by muLCs after incubation with  $\gamma$ -irradiated *S. aureus* USA300 (24 h). Values  
 632 were compared to unexposed control by one-way ANOVA followed by Dunnett's multiple  
 633 comparison test.

634 Data are presented as percentage GFP+ cells (A, B), geometric mean fluorescent intensity or  
 635 mean concentration (C) +/- standard error of mean (SEM) from three independent  
 636 experiments, except for (A) (four donors with single measurements). \* $P < 0.05$ , \*\* $P < 0.01$ ,  
 637 \*\*\* $P < 0.001$ .

Langerin recognizes *S. aureus* wall teichoic acid

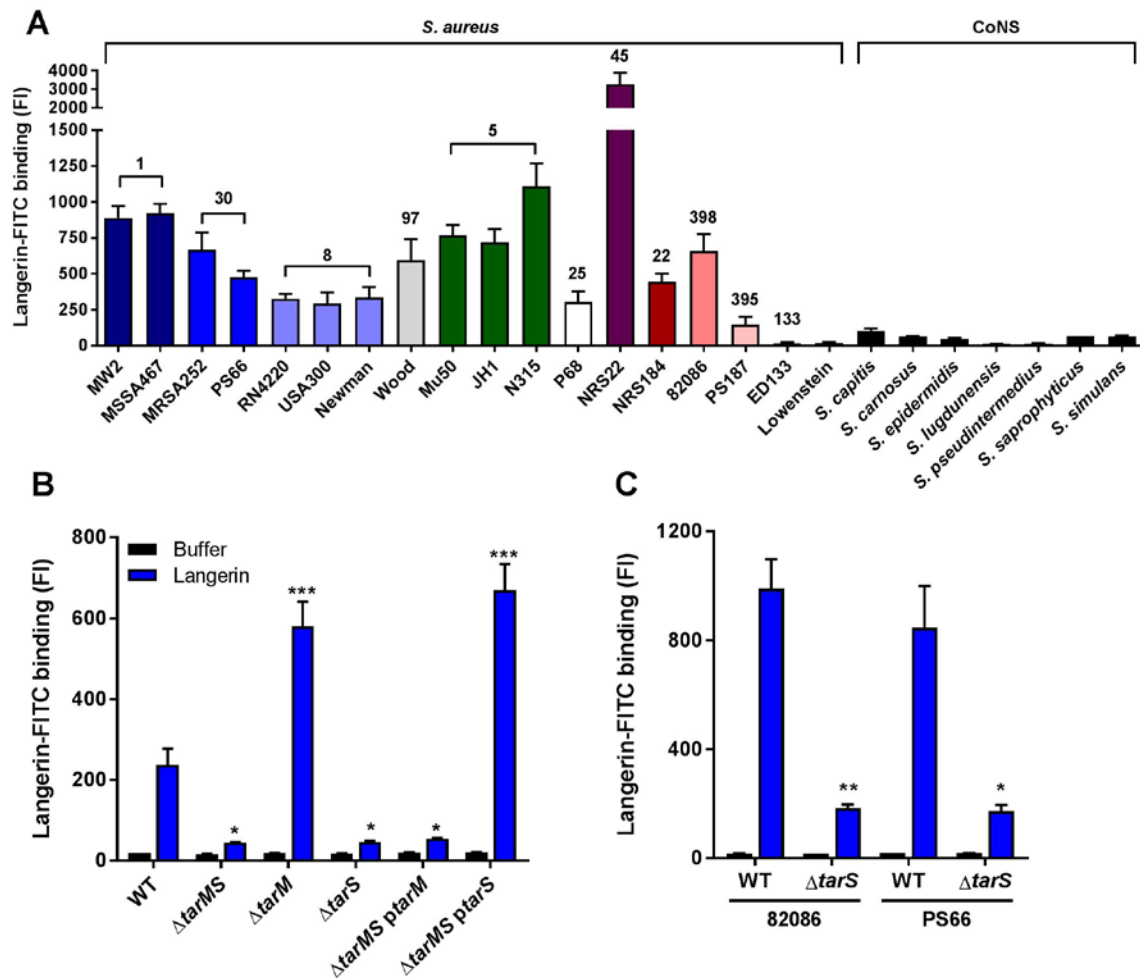

638

639 **Figure 2. Langerin recognizes *S. aureus* in a *tarS*-dependent manner through the**  
 640 **conserved WTA  $\beta$ -GlcNAc epitope**

641 Binding of recombinant human langerin-FITC to (A) 18 wild-type *S. aureus* strains (11  
 642 different clonal complexes, indicated above the bars and by different color) and a selection of  
 643 coagulase-negative staphylococcal species (CoNS); (B) *S. aureus* USA300 wild-type (WT)  
 644 and WTA biosynthesis mutants  $\Delta tarMS$ ,  $\Delta tarM$ ,  $\Delta tarS$ ,  $\Delta tarMS \Delta tarM$  and  $\Delta tarMS \Delta tarS$ ; and  
 645 (C) two representative *S. aureus* isolates (82086 and PS66) that naturally lack *tarM* and their  
 646 isogenic  $\Delta tarS$  mutants. For B, C: all strains were grown to mid-exponential phase and  
 647 incubated with langerin-FITC (blue) or buffer (black). Binding was assessed by flow  
 648 cytometry. Data were compared by one-way ANOVA followed by Dunnett's multiple  
 649 comparison test (B) or by unpaired two-tailed *t*-test (C) and are presented as geometric  
 650 mean fluorescence intensity + SEM from three independent experiments. \**P* < 0.05, \*\**P* <  
 651 0.01, \*\*\**P* < 0.001.

Langerin recognizes *S. aureus* wall teichoic acid

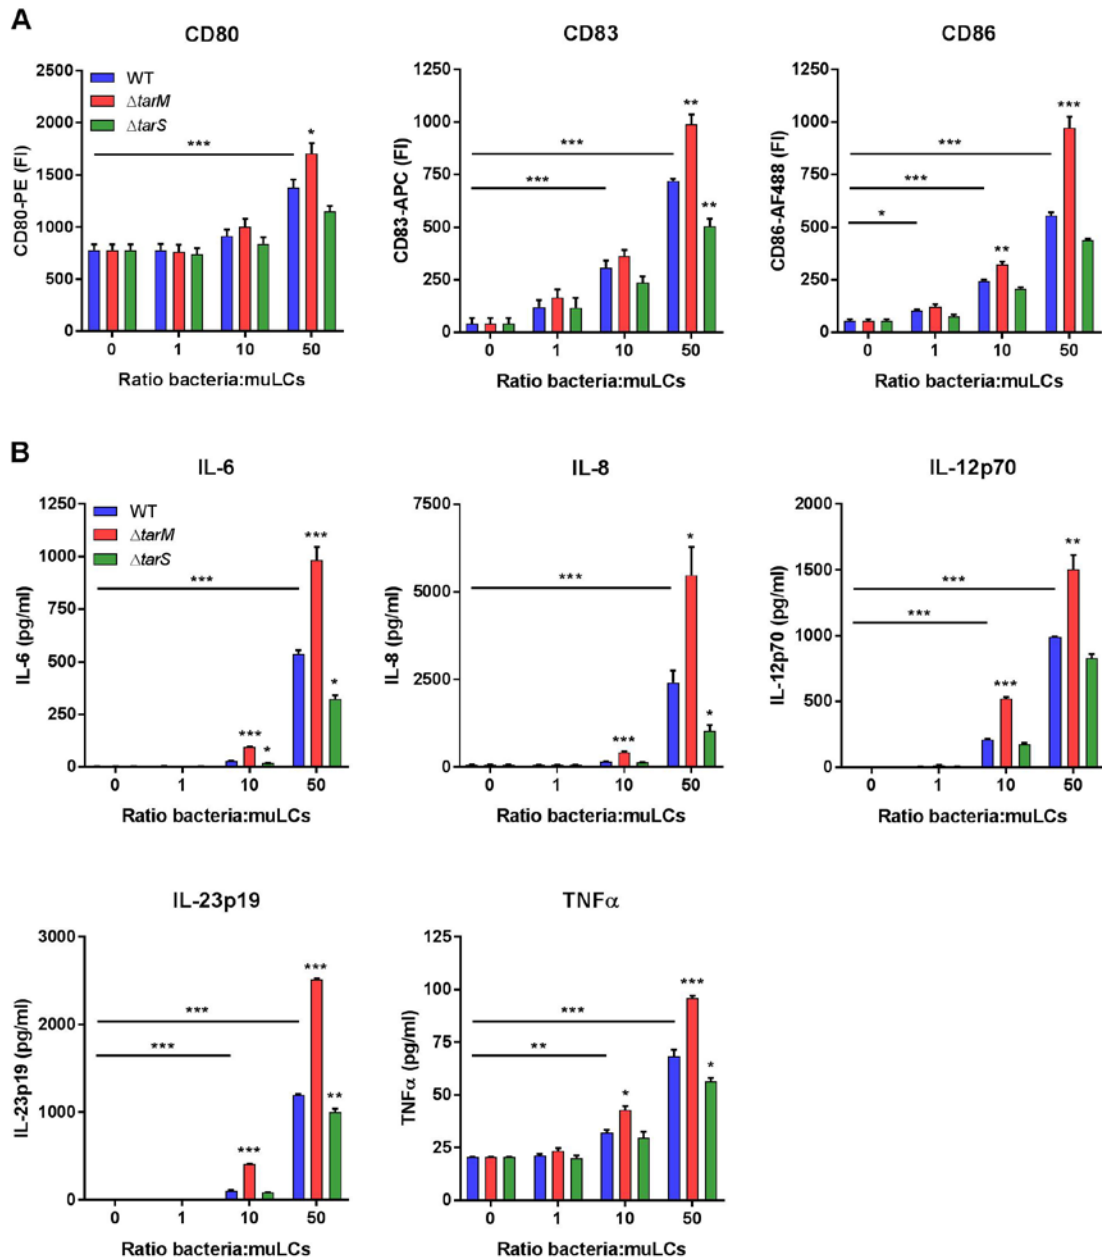

652

653 **Figure 3. *S. aureus* induces a Th1 and Th17 cytokine profile in LCs, which is affected**  
 654 **by the WTA glycoprofile**

655 Expression of (A) co-stimulatory molecules CD80 and CD86 and maturation marker CD83  
 656 and (B) cytokines IL-6, IL-8, IL12p70, IL23p19 and TNF $\alpha$  by muLCs. muLCs were incubated  
 657 with  $\gamma$ -irradiated *S. aureus* USA300 wild-type (WT),  $\Delta tarM$  and  $\Delta tarS$  for 24 h. muLCs  
 658 stimulated with WT *S. aureus* were compared to the unstimulated control and muLCs  
 659 stimulated with  $\Delta tarM$  and  $\Delta tarS$  were compared to their respective WT controls within the  
 660 same ratio by one-way ANOVA followed by Dunnett's multiple comparison test. Data are  
 661 presented as geometric mean fluorescence intensity or mean concentration + SEM from  
 662 three independent experiments. \* $P < 0.05$ , \*\* $P < 0.01$ , \*\*\* $P < 0.001$ .

## Langerin recognizes *S. aureus* wall teichoic acid

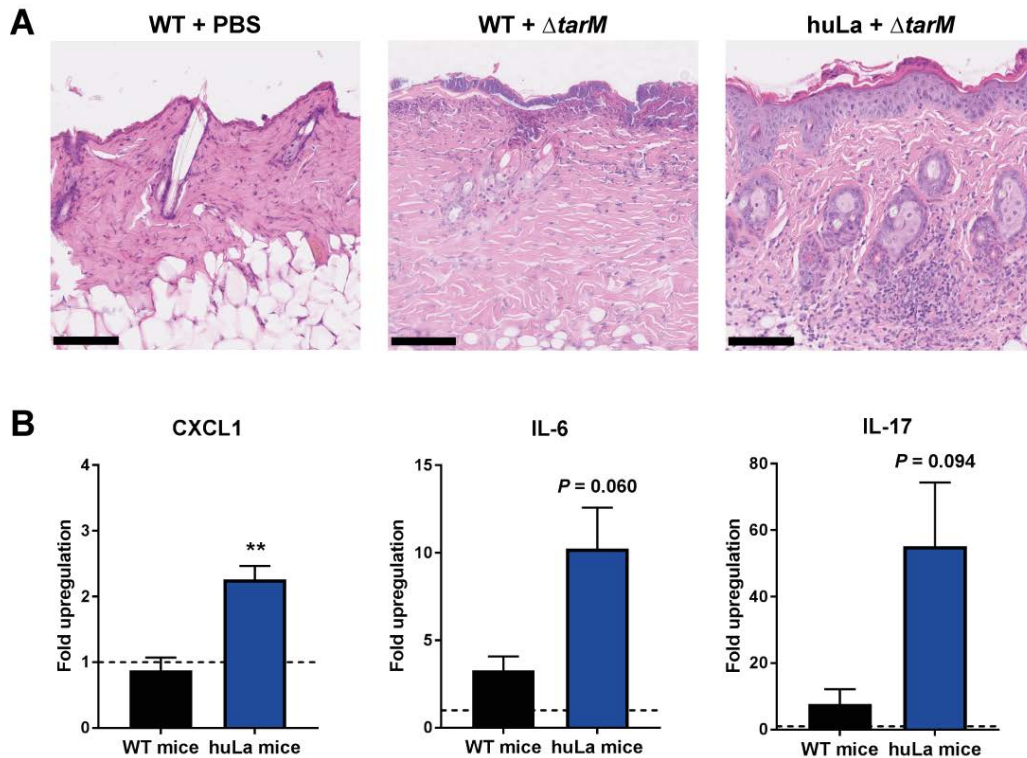

663

664 **Figure 4. Human langerin transgenic mice show an enhanced inflammation to**  
665 **epicutaneous *S. aureus* infection**

666 (A) Representative images of hematoxylin and eosin staining of skin biopsies and (B)  
667 transcript abundance of *CXCL1*, *IL-6* and *IL-17* from the lesions of WT (n=3) and huLangerin  
668 (n=4) mice 40 hours post-epicutaneous inoculation with *S. aureus*  $\Delta tarM$ . The scale bars in  
669 (A) represent 100  $\mu$ m. Data in (B) are presented as fold upregulation + SEM relative to  
670 *GAPDH* from three or four technical replicates and normalized for the WT/PBS control. The  
671 groups were compared by unpaired two-tailed *t*-test. \*\**P* < 0.01.
